# Supplementary material for: Selecting lncRNAs in gastric cancer cells for directed therapy with bioactive peptides and chemotherapy drugs
Source: PubMed Central journal article supplement (PMC5689669; doi:10.18632/oncotarget.20977), 2017-09-18
Supplement: oncotarget-08-86082-s001.pdf [file oncotarget-08-86082-s001.pdf]

# Selecting lncRNAs in gastric cancer cells for directed therapy with bioactive peptides and chemotherapy drugs

## SUPPLEMENTARY MATERIALS

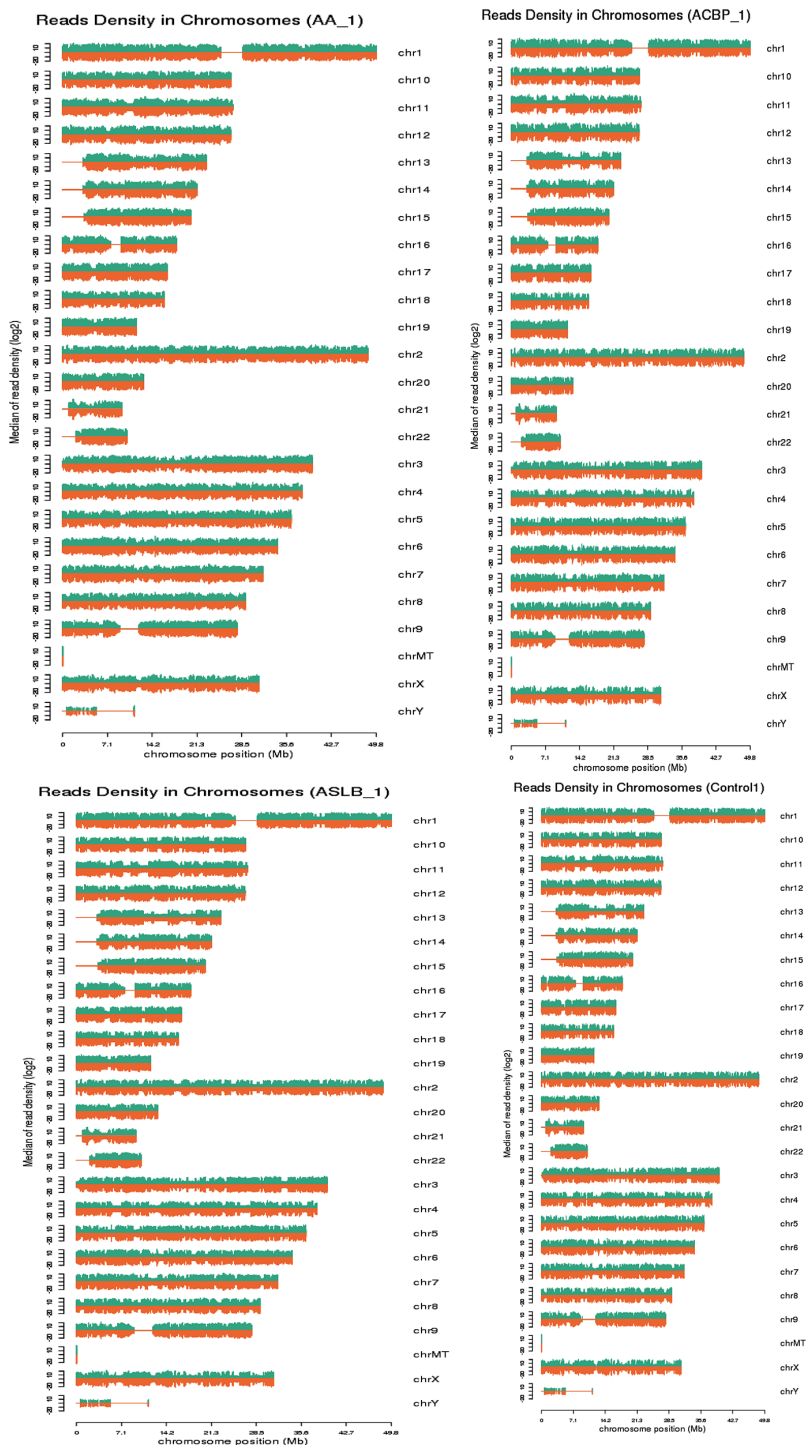

Supplementary Figure 1: Read density in chromosomes.

**Supplementary Table 1 : The list of selected lncRNAs and mRNAs for validation by qPCR**

| Number | Transcript ID     | Transcript type  | Gene ID           | Gene name     | Length |
|--------|-------------------|------------------|-------------------|---------------|--------|
| 1      | ENST00000623937.1 | Annotated_lncRNA | ENSG00000279901.1 | CTD-2270P14.2 | 1659   |
| 2      | ENST00000318291.4 | Annotated_lncRNA | ENSG00000177406.4 | RP11-218M22.1 | 2194   |
| 3      | ENST00000453666.2 | Annotated_lncRNA | ENSG00000225329.3 | LHFPL3-AS2    | 923    |
| 4      | ENST00000513708.1 | Annotated_lncRNA | ENSG00000230561.3 | LINC01183     | 663    |
| 5      | ENST00000570269.1 | Annotated_lncRNA | ENSG00000259976.1 | RP11-553L6.5  | 1679   |
| 6      | ENST00000624705.1 | Annotated_lncRNA | ENSG00000279602.1 | CTD-3014M21.1 | 1321   |
| 7      | ENST00000618589.1 | Annotated_lncRNA | ENSG00000276216.1 | CH17-373J23.1 | 347    |
| 8      | TCONS_05626979    | Novel_lncRNA     | XLOC_1828515      | —             | 1825   |
| 9      | TCONS_04734773    | Novel_lncRNA     | XLOC_1552256      | —             | 716    |
| 10     | TCONS_04191128    | Novel_lncRNA     | XLOC_1370458      | —             | 8470   |
| 11     | ENST00000216117   | mRNA             | ENSG00000100292   | HMOX1         | 1822   |
| 12     | ENST00000315274   | mRNA             | ENSG00000196611   | MMP1          | 1970   |

**Supplementary Table 2: The list of differentially expressed lncRNAs between ACBP, ASLB, and combined ACBP and ASLB treatment cells and control cells**

See Supplementary File 1

**Supplementary Table 3: The altered expression (log<sub>2</sub> value) of known lncRNAs between each two comparisons of different exposed cells**

See Supplementary File 2
